# Supplementary material
Source: publisher figshare collection journal article supplement (https://tandf.figshare.com/articles/dataset/_/5948104)
Supplement: Supplementary file 1 [file 1]

# Physiological and transcriptomic analysis of responses to different levels of iron excess stress in various tissues of rice

May Sann Aung, Hiroshi Masuda, Takanori Kobayashi, Naoko K. Nishizawa

Ishikawa Prefectural University, Suematsu 1-308, Nonoichi, Ishikawa, 921-8836, Japan

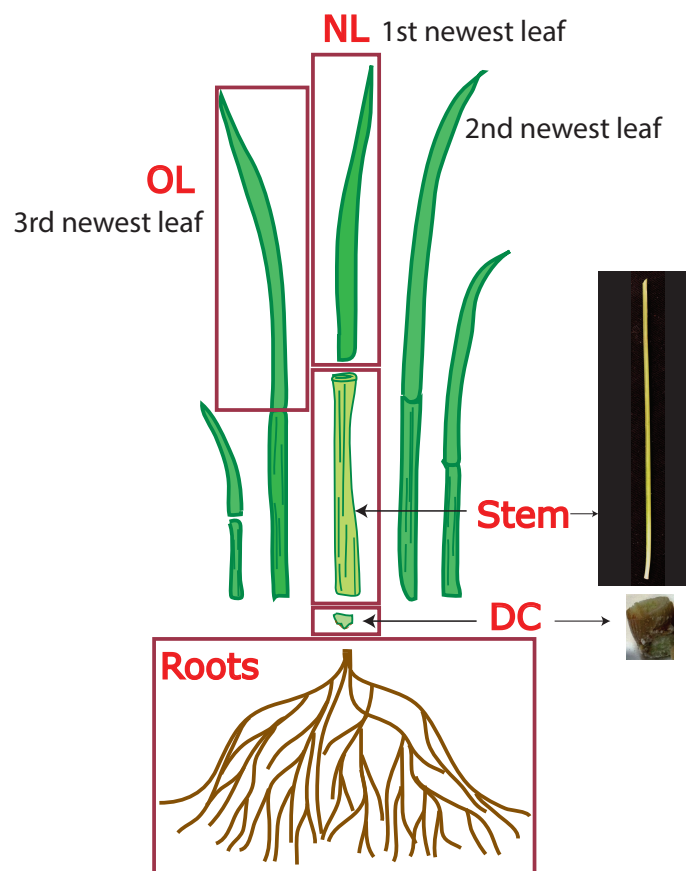

**Supplemental Figure 1.** Various tissues of rice divided and used for microarray analysis. DC: discrimination center or the junction between root and shoot; NL: newest leaf; OL: older leaf (3rd newest leaf).

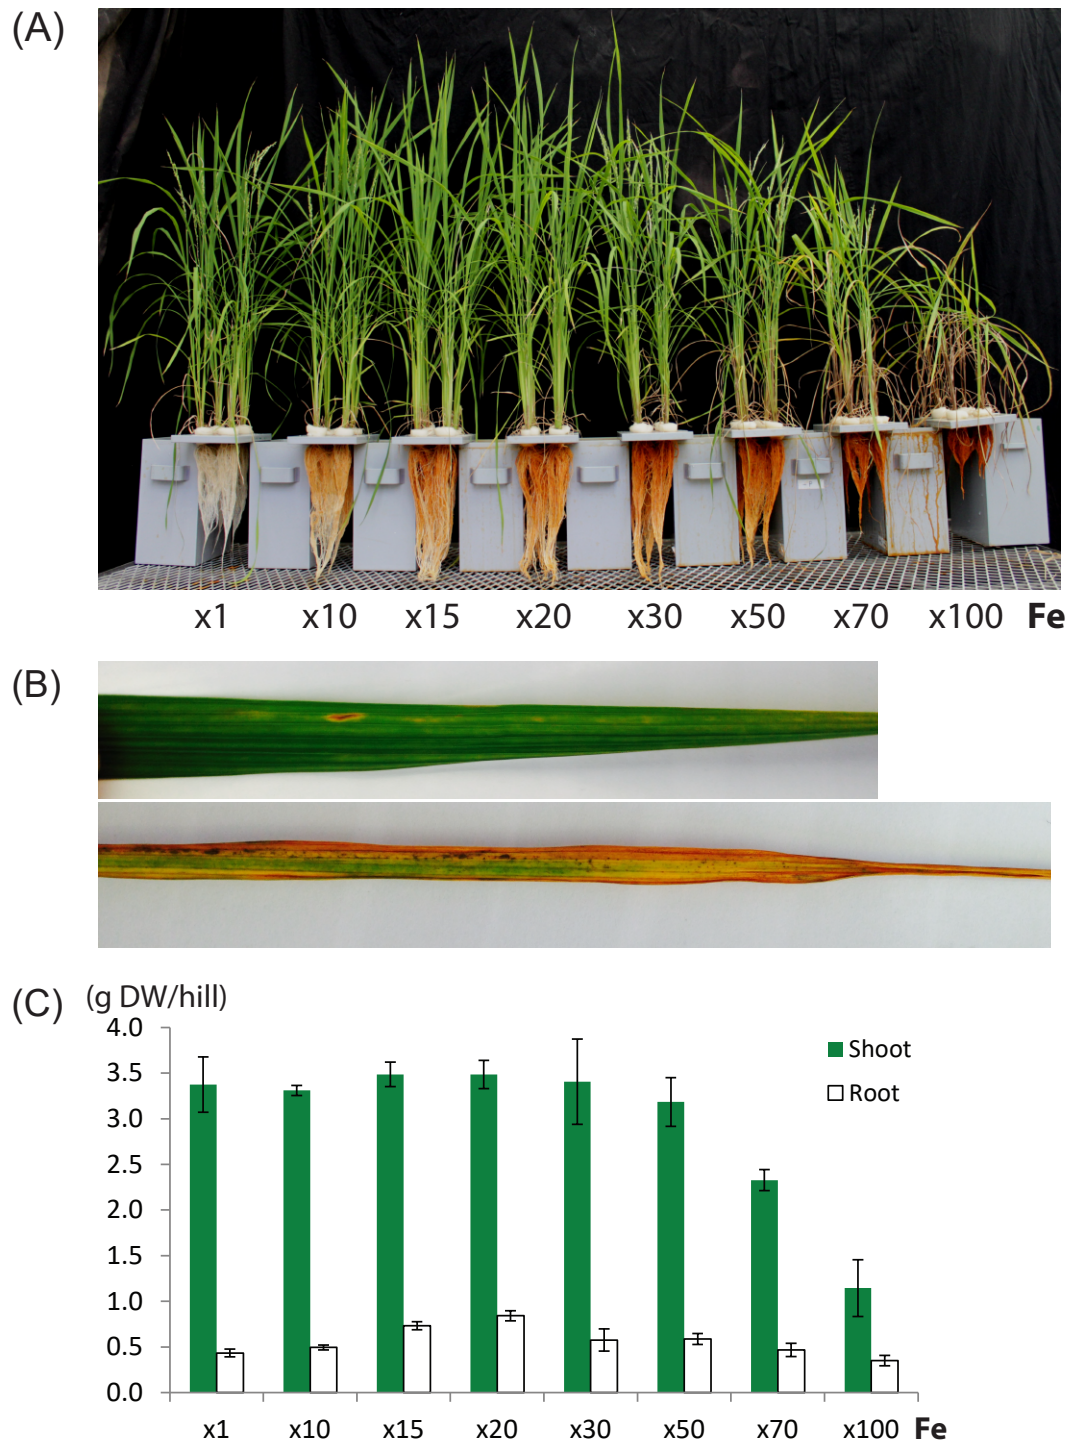

**Supplemental Figure 2.** Another trial of plant growth test on various levels of Fe excess stress. (A) shoot and root growth at 41 days after Fe excess exposure, (B) newest leaf (Upper) and old leaf (Lower) of x70 Fe plant at 19 days after Fe exposure and (C) shoot and root dry weight. Error bars represent  $\pm$  SD of biological replicates,  $n = 3$ .

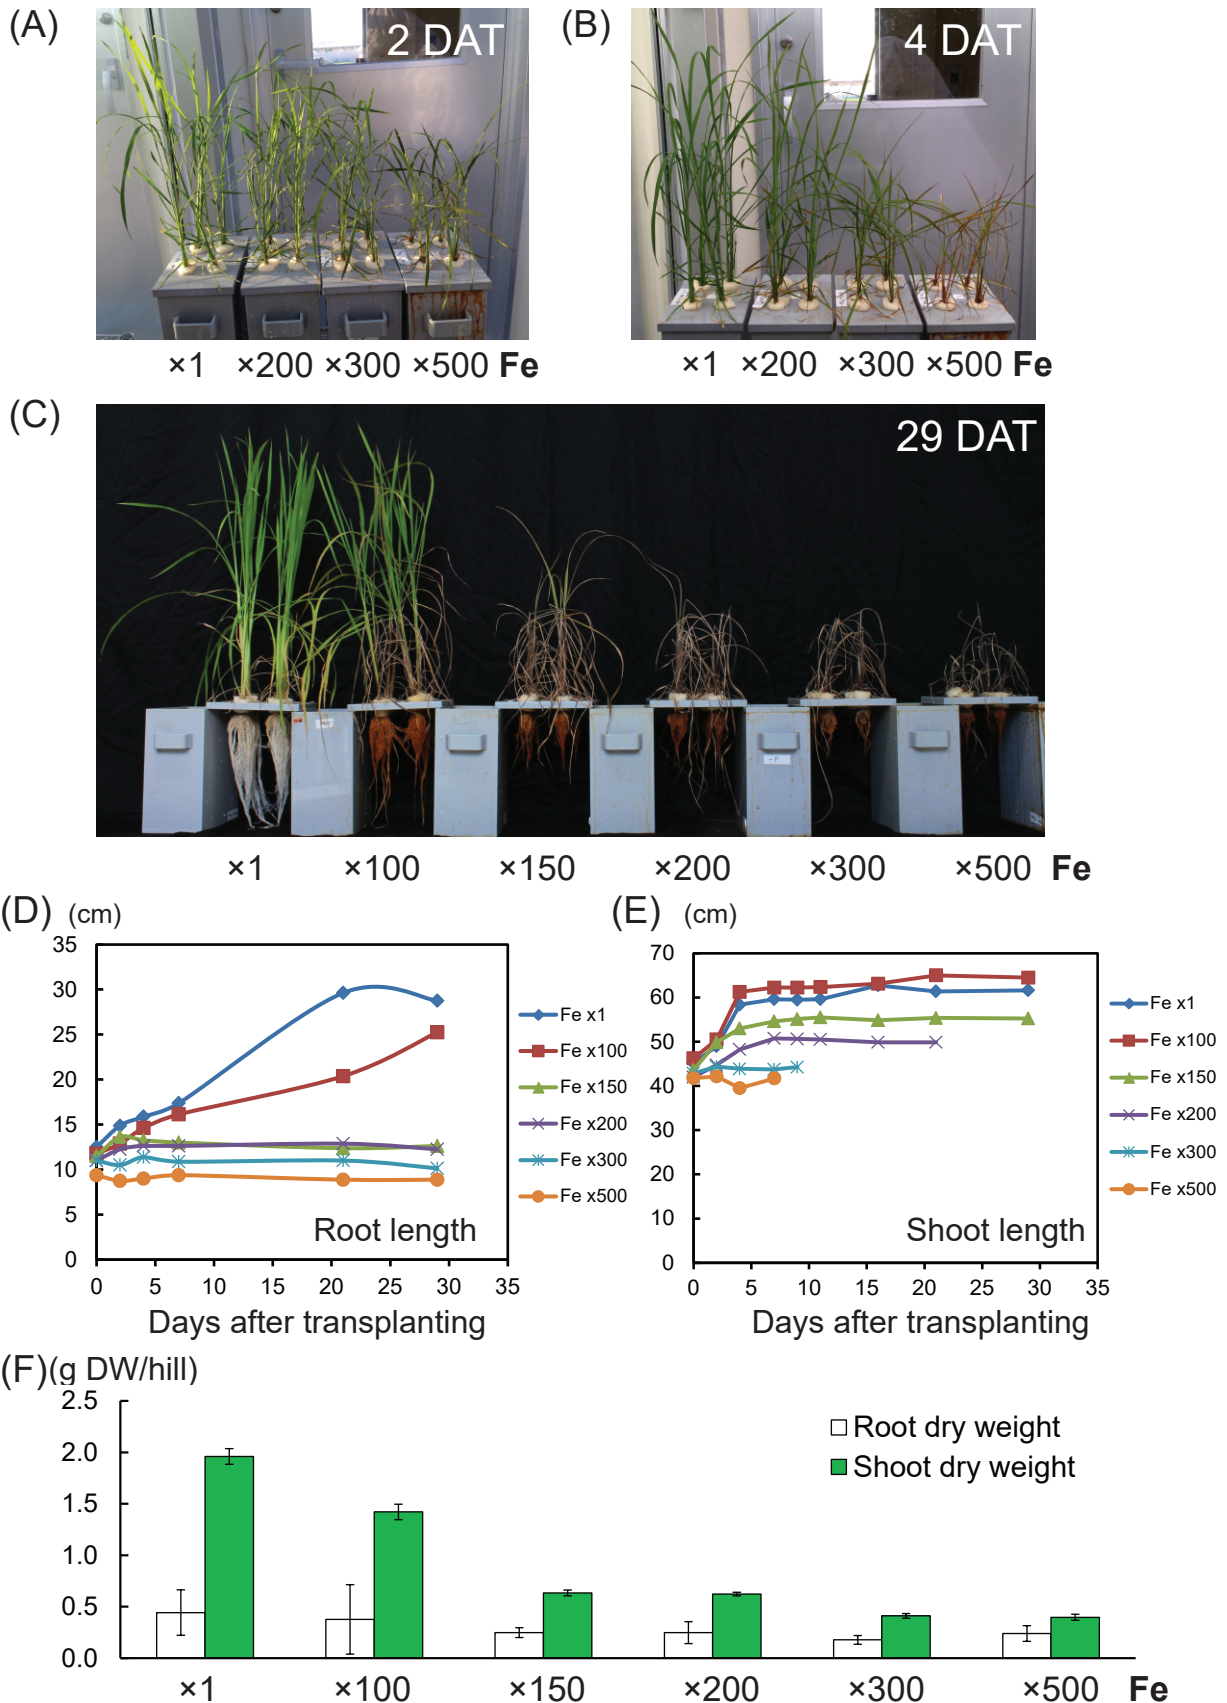

**Supplemental Figure 3.** Plant growth and symptoms after 29 days of Fe excess exposure with severe levels of Fe intensities. (A, B, C) Plant appearance and symptoms, (D) Root growth, (E) Shoot growth and (F) Root and shoot dry weight. DAT: Days after transplanting. NL: Newest leaf; OL1: Old leaf 1 (3rd newest leaf); OL2: Old leaf 2 (4th newest leaf). Error bars represent  $\pm$  SD of biological replicates,  $n = 4$ .

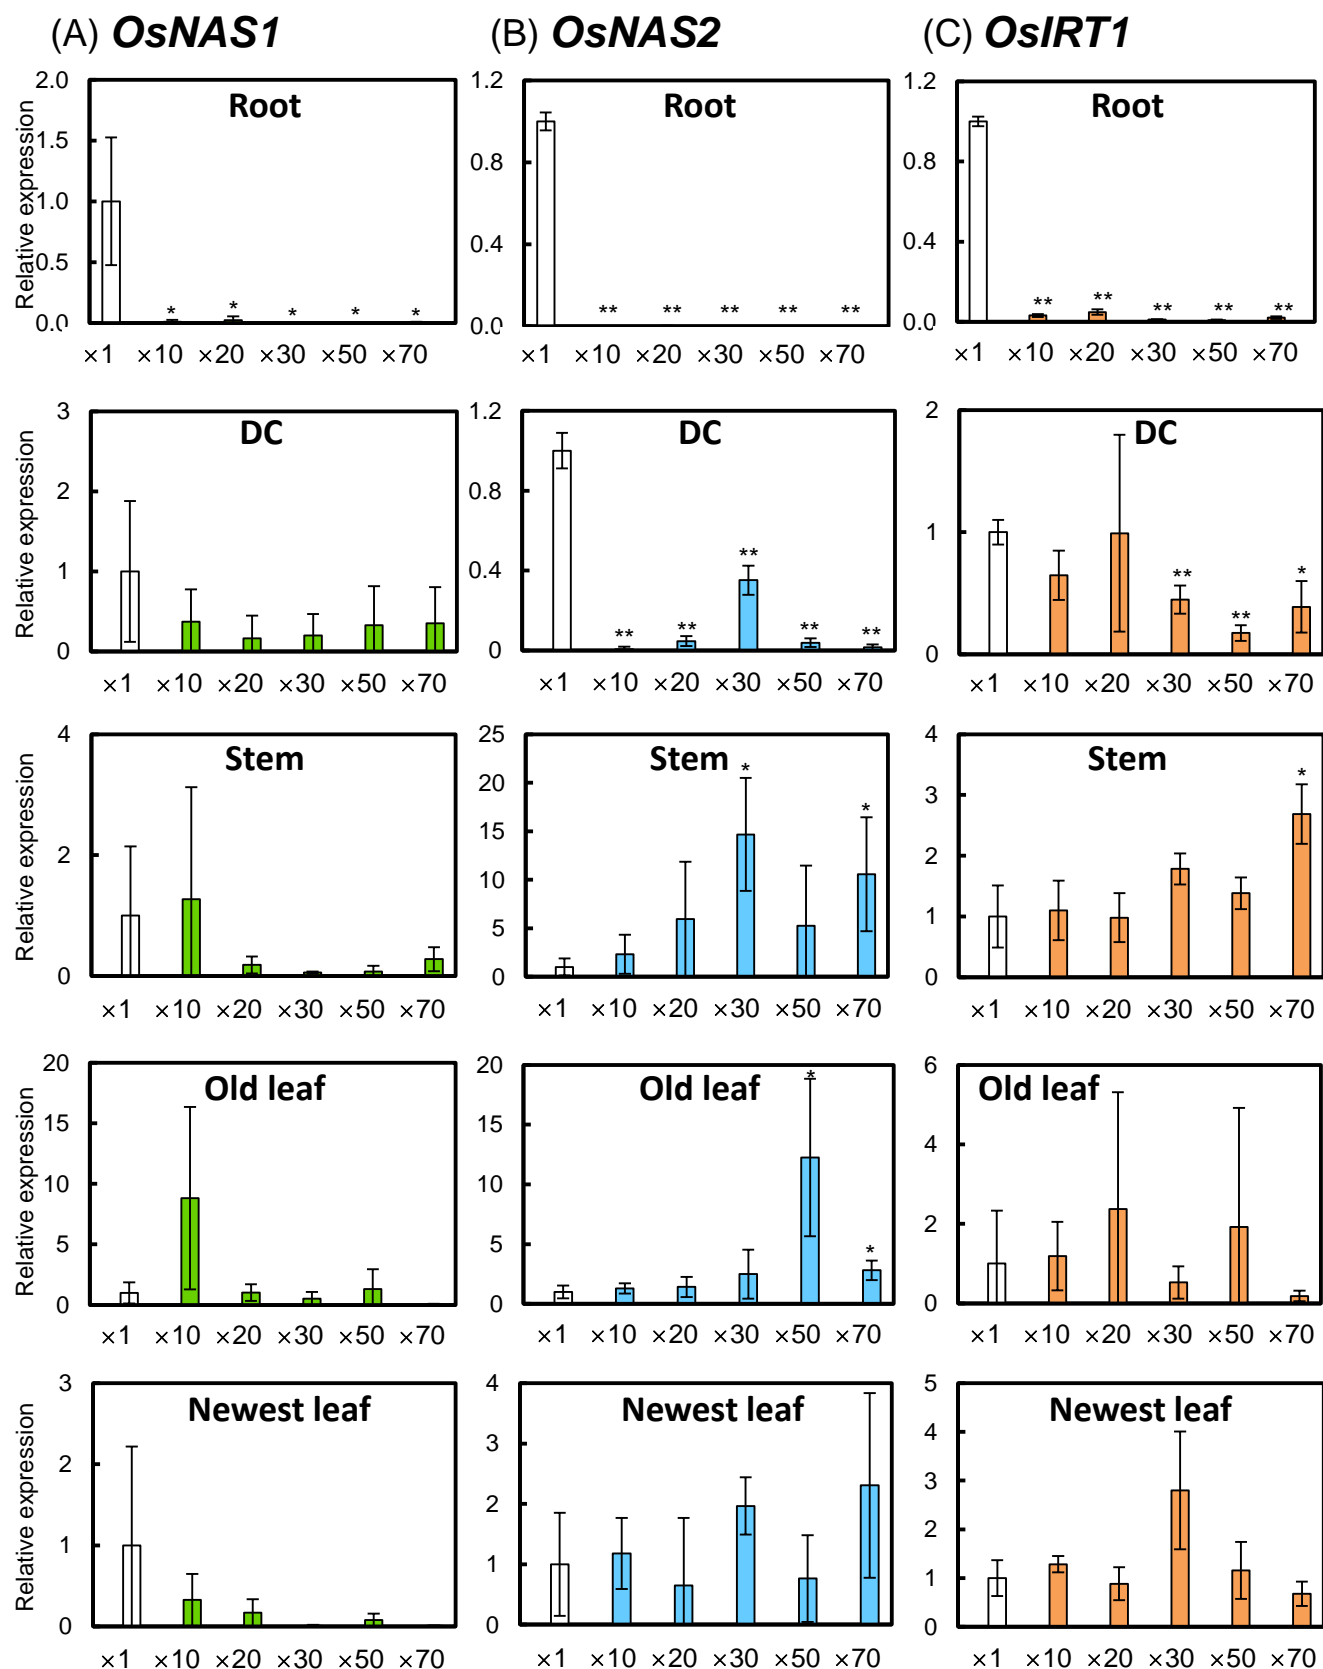

**Supplemental Figure 4.** Expression of (A) *OsNAS1*, (B) *OsNAS2* and (C) *OsIRT1* genes in various tissues of rice confirmed by real time RT-PCR. DC: discrimination center. The numbers shown on horizontal axis of the graphs indicate the levels of Fe excess. The Error bar shows the technical variation, SD; n = 3. Data were normalized to the observed expression levels of *alpha-Tubulin* and presented as relative gene expression in each tissue (x1 Fe = 1). Asterisks above the bars indicate significant differences (\* $P < 0.05$ ; \*\* $P < 0.01$ ) compared with the control (x1 Fe).



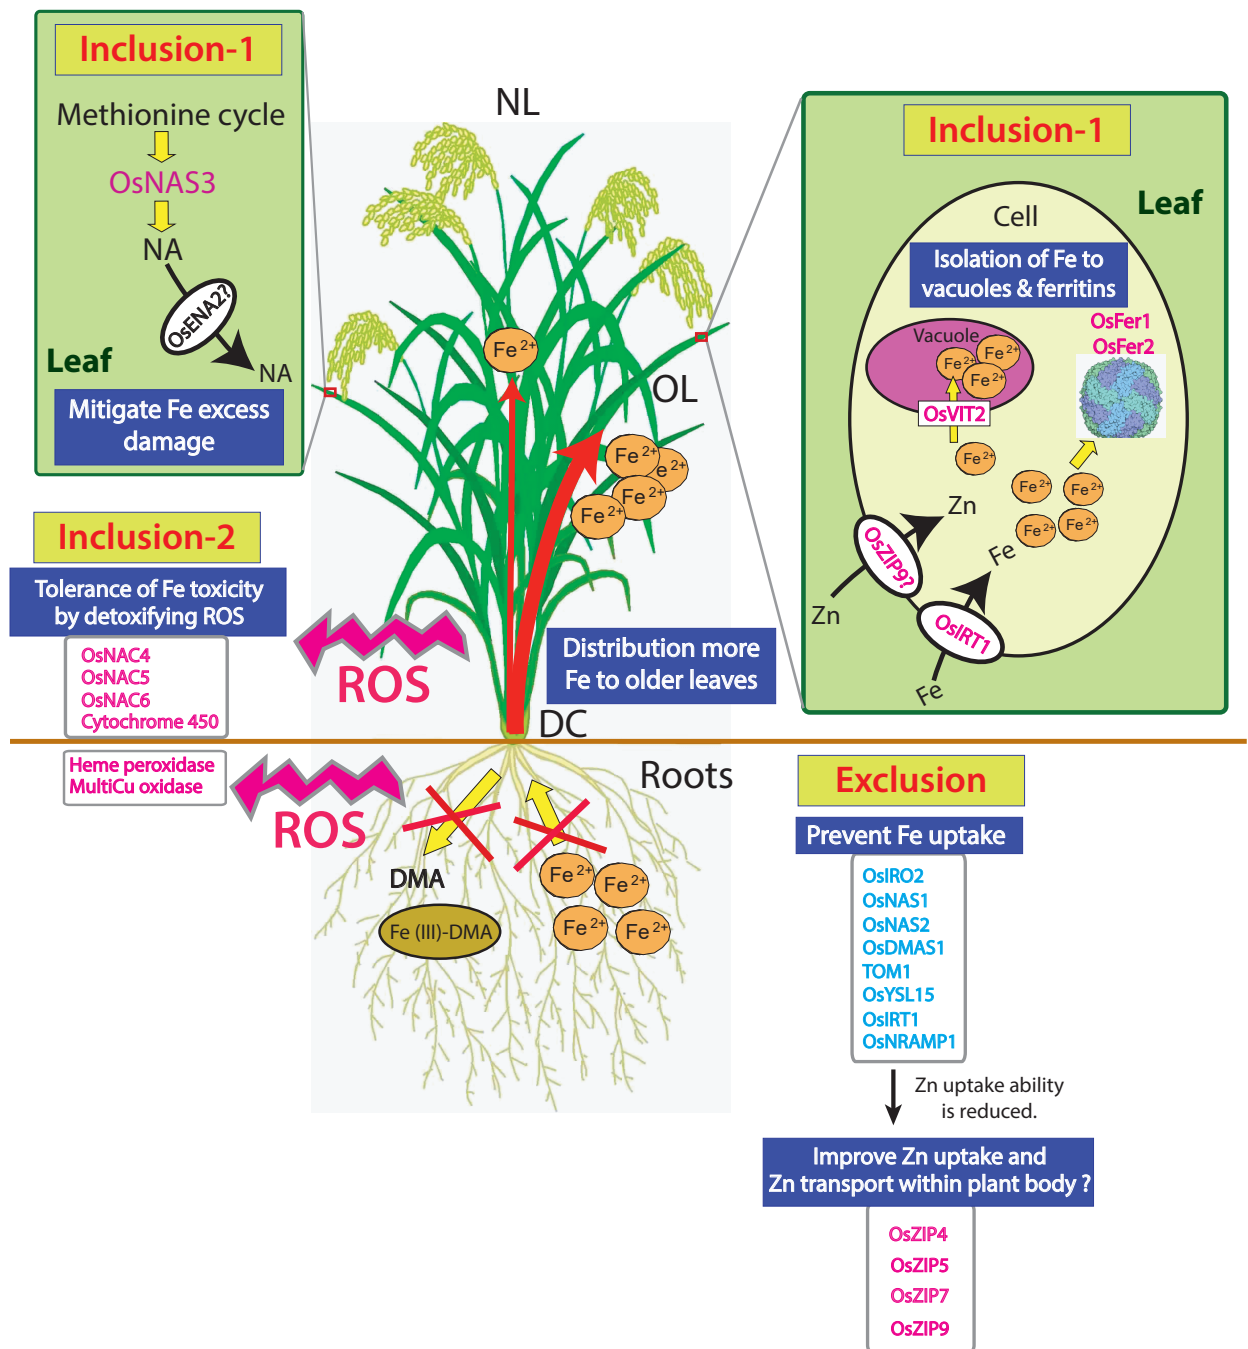

**Supplemental Figure 5.** Hypothetical model of Fe excess tolerance mechanism.

DC: Discrimination Center; OL: Older leaf; NL: Newest leaf; NA: Nicotianamine; DMA: Deoxymugineic acid; Pink letters: highly induced genes; Blue letters: highly repressed genes. The ferritin picture was kindly provided by Dr. David S. Goodsell (Scripps Research Institute, La Jolla, CA, U.S.A.) and the RCSB PDB.

**Supplemental Table 1.** Primer list used in Real Time RT-PCR.

| Primers                       | Sequences                               |
|-------------------------------|-----------------------------------------|
| alpha- <i>Tubulin</i> forward | 5'-TCT TCC ACC CTG AGC AGC TC-3'        |
| alpha- <i>Tubulin</i> reverse | 5'-AAC CTT GGA GAC CAG TGC AG-3'        |
| <i>OsIRT1</i> forward         | 5'-CGT CTT CTT CTT CTC CAC CAC GAC-3'   |
| <i>OsIRT1</i> reverse         | 5'-GCA GCT GAT GAT CGA GTC TGA CC-3'    |
| <i>OsNAS1</i> forward         | 5'-GTC TAA CAG CCG GAC GAT CGA AAG G-3' |
| <i>OsNAS1</i> reverse         | 5'-TTT CTC ACT GTC ATA CAC AGA TGG C-3' |
| <i>OsNAS2</i> forward         | 5'-TGA GTG CGT GCA TAG TAA TCC TGG C-3' |
| <i>OsNAS2</i> reverse         | 5'-CAG ACG GTC ACA AAC ACC TCT TGC-3'   |
| <i>OsNAS3</i> forward         | 5'-CGA TGA CTG CTT CCA TCG CTT-3'       |
| <i>OsNAS3</i> reverse         | 5'-GGC ATG CAT TCA TGC ATG ACT GC-3'    |
| <i>OsFer1&amp;2</i> forward   | 5'- GTG AAG GGC AGT AGT AGG TTT CG -3'  |
| <i>OsFer1&amp;2</i> reverse   | 5'- CGC GCG ACA TAC ACA TGA TTC TG -3'  |
| <i>OsVIT2</i> forward         | 5'- GTT TGA GTT GGG ACT GGA GAA G-3'    |
| <i>OsVIT2</i> reverse         | 5'- CCT TGA CAT AGC CGA AGA AGA G-3'    |

**Supplemental Table 2.** Ratio increased in Fe concentrations in newest leaves (NLs), old leaves (OLs) and roots of the plants cultivated under various Fe excess levels compared to those of control plants.

|             | x10/x1 | x20/x1 | x30/x1 | x50/x1 | x70/x1 | x100/x1 | x150/x1 |
|-------------|--------|--------|--------|--------|--------|---------|---------|
| <b>NL</b>   | 1.9    | 2.3    | 3.5    | 4.1    | 5.9    | 11.8    | 24.7    |
| <b>OL1</b>  | 2.9    | 3.6    | 4.4    | 7.4    | 10.9   | 25.6    | 48.1    |
| <b>Root</b> | 4.0    | 8.7    | 9.1    | 9.9    | 9.6    | 6.7     | 7.9     |

Supplemental Table 3 Expression ratios of other Fe-related genes

<0.2 <0.5 0.5 – 2 >2 >5

| Locus                                  | Gene     | Description                                               | Root         |              |              |              | DC           |              |              |              | Stem         |              |              |              | Old leaf     |              |              |              | Newest leaf  |              |              |              |
|----------------------------------------|----------|-----------------------------------------------------------|--------------|--------------|--------------|--------------|--------------|--------------|--------------|--------------|--------------|--------------|--------------|--------------|--------------|--------------|--------------|--------------|--------------|--------------|--------------|--------------|
|                                        |          |                                                           | × 10/<br>× 1 | × 20/<br>× 1 | × 50/<br>× 1 | × 70/<br>× 1 | × 10/<br>× 1 | × 20/<br>× 1 | × 50/<br>× 1 | × 70/<br>× 1 | × 10/<br>× 1 | × 20/<br>× 1 | × 50/<br>× 1 | × 70/<br>× 1 | × 10/<br>× 1 | × 20/<br>× 1 | × 50/<br>× 1 | × 70/<br>× 1 | × 10/<br>× 1 | × 20/<br>× 1 | × 50/<br>× 1 | × 70/<br>× 1 |
| Other Fe related transporters          |          |                                                           |              |              |              |              |              |              |              |              |              |              |              |              |              |              |              |              |              |              |              |              |
| Os04g0578600                           | OsFRO2   | Ferric reductase oxidase 2                                | 0.74         | 0.73         | 0.81         | 0.75         | 0.45         | 0.27         | 0.07         | 0.04         | 0.10         | 0.04         | 0.08         | 0.04         | 0.42         | 0.75         | 0.73         | 0.65         | 0.36         | 0.58         | 0.40         | 0.29         |
| Os03g0571900                           | PEZ1     | Phenolic Efflux Transporter 1                             | 0.41         | 0.60         | 0.71         | 0.89         | 0.79         | 0.60         | 1.19         | 0.73         | 0.44         | 0.70         | 1.00         | 4.13         | 0.60         | 0.75         | 1.44         | 1.83         | 0.57         | 0.73         | 1.24         | 1.67         |
| Os03g0572900                           | PEZ2     | Phenolics efflux transporter 2, OsCIM4L                   | 0.99         | 0.74         | 0.63         | 0.68         | 1.14         | 0.69         | 0.57         | 0.57         | 2.10         | 1.03         | 1.31         | 1.51         | 1.14         | 0.91         | 0.63         | 0.56         | 0.82         | 0.90         | 0.84         | 0.94         |
| Os01g0279400                           | OsZIFL2  | (Zinc-induced facilitator –like) family genes             | 1.14         | 0.96         | 0.76         | 0.53         | 0.53         | 0.64         | 0.31         | 0.51         | 0.54         | 2.04         | 1.02         | 0.87         | 0.30         | 0.66         | 0.16         | 0.10         | 0.40         | 0.55         | 0.23         | 0.22         |
| Os12g0133300                           | OsZIFL13 | (Zinc-induced facilitator –like) family genes             | 0.76         | 0.86         | 0.68         | 0.79         | 0.80         | 0.59         | 1.73         | 0.79         | 0.99         | 0.91         | 0.69         | 0.88         | 0.79         | 0.78         | 0.94         | 0.96         | 1.30         | 0.83         | 0.74         | 0.76         |
| Os01g0304100                           | OsCCC2   | Putative cation: chloride co-transporter                  | 0.86         | 1.35         | 1.17         | 0.98         | 0.77         | 0.81         | 0.33         | 0.65         | 0.81         | 0.62         | 0.58         | 0.62         | 0.81         | 0.99         | 1.19         | 2.97         | 1.00         | 0.91         | 0.93         | 0.66         |
| Os09g0440700                           | OsCOPT7  | Putative copper cation transporter                        | 0.69         | 0.67         | 0.97         | 1.06         | 0.96         | 0.77         | 1.10         | 1.24         | 0.84         | 0.82         | 0.95         | 1.43         | 0.77         | 0.84         | 1.33         | 1.50         | 0.89         | 0.86         | 0.92         | 0.90         |
| Os03g0216700                           | OsFRDL1  | Citrate efflux transporter                                | 1.65         | 1.44         | 1.59         | 2.54         | 1.17         | 1.40         | 1.84         | 2.11         | 1.17         | 1.17         | 1.32         | 0.93         | 1.82         | 0.87         | 2.14         | 2.35         | 1.37         | 1.14         | 0.80         | 1.17         |
| Os10g0206800                           | OsFRDL2  | Citrate efflux transporter (Putative)                     | 1.41         | 1.20         | 3.19         | 3.76         | 1.26         | 1.09         | 1.91         | 1.77         | 1.49         | 1.03         | 1.21         | 1.52         | 1.23         | 0.91         | 1.01         | 0.98         | 1.02         | 1.04         | 1.09         | 1.28         |
| Os02g0833100                           | OsFRDL3  | Citrate efflux transporter (Putative)                     | 1.11         | 0.99         | 1.00         | 1.03         | 1.08         | 0.92         | 0.98         | 0.90         | 1.14         | 0.90         | 1.14         | 0.71         | 0.96         | 0.89         | 0.70         | 0.67         | 1.52         | 1.23         | 1.07         | 1.11         |
| Other Fe related homeostasis genes     |          |                                                           |              |              |              |              |              |              |              |              |              |              |              |              |              |              |              |              |              |              |              |              |
| Os03g0288000                           | OsMT1b   | Similar to Metallothionein                                | 2.25         | 1.72         | 1.55         | 1.52         | 1.50         | 1.36         | 1.64         | 1.72         | 1.54         | 1.14         | 0.65         | 3.65         | 0.47         | 0.67         | 9.82         | 25.53        | 0.56         | 0.67         | 1.05         | 1.40         |
| Os05g0202800                           | OsMT3b   | Similar to Metallothionein-like protein 3B                | 0.36         | 0.24         | 0.32         | 0.50         | 1.14         | 0.92         | 1.01         | 1.11         | 3.67         | 1.81         | 1.66         | 1.72         | 0.72         | 1.17         | 3.29         | 3.07         | 0.25         | 0.68         | 0.65         | 1.22         |
| Os12g0567800                           | OsMT1f   | Plant metallothionein, family 15 protein                  | 1.06         | 0.70         | 0.49         | 0.57         | 1.26         | 0.81         | 1.52         | 0.51         | 3.54         | 0.82         | 1.21         | 1.97         | 0.76         | 0.59         | 0.79         | 3.32         | 1.66         | 1.26         | 0.69         | 0.85         |
| Os12g0571000                           | OsMT1g   | Metallothionein-like protein type 1                       | 0.80         | 0.51         | 0.24         | 0.34         | 1.23         | 0.82         | 1.15         | 0.45         | 5.63         | 1.45         | 2.07         | 13.98        | 1.68         | 1.78         | 1.24         | 7.64         | 0.40         | 1.12         | 0.57         | 2.18         |
| Other Fe related transcription factors |          |                                                           |              |              |              |              |              |              |              |              |              |              |              |              |              |              |              |              |              |              |              |              |
| Os01g0816100                           | OsNAC4   | Transcription Factor; related to cell death               | 0.50         | 0.64         | 1.63         | 2.05         | 0.69         | 0.63         | 0.71         | 0.95         | 0.43         | 0.70         | 0.42         | 2.64         | 0.79         | 1.06         | 1.51         | 3.50         | 0.75         | 0.76         | 0.90         | 1.28         |
| Os11g0184900                           | OsNAC5   | Transcription Factor; Fe and Zn remobilization            | 1.23         | 0.91         | 1.96         | 2.77         | 0.77         | 0.66         | 1.45         | 1.34         | 0.77         | 0.73         | 0.82         | 1.53         | 0.91         | 0.89         | 2.93         | 4.13         | 0.63         | 0.49         | 1.27         | 1.30         |
| Os01g0884300                           | OsNAC6   | Transcription Factor; related to stress induce genes      | 0.55         | 0.68         | 0.93         | 1.15         | 0.94         | 0.59         | 1.09         | 1.18         | 0.88         | 0.74         | 0.94         | 1.68         | 0.56         | 0.87         | 1.29         | 3.31         | 0.84         | 0.90         | 0.83         | 1.00         |
| Os03g0339100                           | OsPRL1   | Transcription Factor                                      | 0.89         | 0.77         | 0.68         | 0.80         | 0.97         | 0.88         | 0.40         | 0.99         | 1.10         | 1.22         | 1.15         | 1.19         | 0.80         | 0.92         | 1.32         | 1.54         | 0.88         | 0.97         | 0.91         | 1.02         |
| Os03g0860100                           | OsEBP1   | Ethylene responsive element binding protein encoding gene | 1.59         | 0.31         | 0.52         | 0.67         | 0.90         | 0.43         | 0.59         | 0.69         | 0.12         | 0.36         | 0.25         | 2.19         | 1.07         | 2.25         | 9.37         | 20.71        | 0.72         | 1.41         | 1.98         | 3.24         |
| Other metal transporters               |          |                                                           |              |              |              |              |              |              |              |              |              |              |              |              |              |              |              |              |              |              |              |              |
| Os12g0228800                           |          | Calcium-binding protein                                   | 1.82         | 2.01         | 1.17         | 1.26         | 1.49         | 1.14         | 0.93         | 0.83         | 1.16         | 0.69         | 1.02         | 0.85         | 1.47         | 0.87         | 0.88         | 0.70         | 1.64         | 1.22         | 1.15         | 0.54         |
| Os01g0604500                           |          | Calcium-binding protein                                   | 0.75         | 0.75         | 0.73         | 0.69         | 0.71         | 0.48         | 0.46         | 0.77         | 0.96         | 0.94         | 0.56         | 1.06         | 1.20         | 0.94         | 0.52         | 0.53         | 0.79         | 0.70         | 0.65         | 0.64         |
| Os06g0190800                           |          | Glutamate receptor protein, calcium ion homeostasis       | 1.10         | 0.87         | 1.29         | 1.28         | 0.88         | 0.93         | 0.89         | 0.87         | 0.79         | 0.86         | 0.90         | 0.80         | 1.20         | 0.82         | 0.78         | 0.67         | 0.70         | 0.74         | 0.78         | 0.73         |
| Os10g0418100                           |          | Putative Ca <sup>2+</sup> –transporting ATPase            | 0.25         | 0.47         | 0.34         | 0.48         | 0.60         | 1.10         | 0.30         | 0.72         | 1.07         | 0.94         | 2.07         | 0.97         | 0.28         | 1.14         | 1.85         | 2.10         | 1.76         | 1.35         | 1.46         | 1.32         |
| Os04g0581800                           |          | Copper-binding protein-related                            | 1.06         | 0.75         | 1.56         | 1.24         | 0.99         | 0.83         | 0.50         | 0.63         | 0.83         | 1.78         | 0.62         | 0.58         | 0.55         | 0.91         | 1.08         | 1.10         | 2.05         | 2.17         | 0.83         | 1.19         |
| Os02g0245800                           |          | Potassium Channel                                         | 0.54         | 0.27         | 0.31         | 0.45         | 1.07         | 1.42         | 1.75         | 1.14         | 1.13         | 1.31         | 0.94         | 1.17         | 1.43         | 1.25         | 0.75         | 0.63         | 0.67         | 1.03         | 0.58         | 0.56         |
| Os09g0448200                           | HAK4     | Potassium ion transmembrane transporter                   | 0.65         | 0.25         | 0.38         | 0.28         | 0.34         | 0.27         | 0.23         | 0.64         | 0.55         | 0.65         | 1.38         | 2.90         | 0.94         | 1.04         | 0.77         | 0.84         | 1.07         | 1.00         | 1.27         | 1.31         |
| Os04g0401700                           | HAK1     | Potassium transporter                                     | 1.63         | 1.29         | 1.34         | 1.39         | 0.75         | 0.51         | 1.10         | 1.38         | 0.64         | 0.75         | 2.73         | 18.28        | 0.79         | 0.92         | 2.57         | 3.21         | 1.03         | 1.72         | 2.59         | 6.51         |
| Os04g0186400                           | OsPT1    | Phosphate transpoter                                      | 0.79         | 0.90         | 0.74         | 0.67         | 0.70         | 0.46         | 0.58         | 0.35         | 1.67         | 1.00         | 1.99         | 3.12         | 1.11         | 1.32         | 1.77         | 2.22         | 1.21         | 1.55         | 1.30         | 1.28         |
| Os04g0186400                           | Pht1–2   | Phosphate transpoter                                      | 0.91         | 0.98         | 0.87         | 0.81         | 0.89         | 0.62         | 0.78         | 0.51         | 1.74         | 1.15         | 1.97         | 2.29         | 1.07         | 1.19         | 1.60         | 1.97         | 1.29         | 1.58         | 1.33         | 1.29         |
| Os03g0226400                           |          | Manganese transporter                                     | 0.88         | 0.87         | 0.89         | 0.81         | 2.41         | 4.43         | 3.74         | 2.40         | 3.13         | 1.04         | 1.26         | 0.73         | 3.25         | 1.24         | 0.72         | 0.30         | 1.61         | 1.48         | 0.67         | 0.53         |
| Os07g0518100                           |          | Sulphate transporter                                      | 0.66         | 0.88         | 1.00         | 0.70         | 0.57         | 0.61         | 0.32         | 0.71         | 1.72         | 1.15         | 1.37         | 7.53         | 1.05         | 0.91         | 2.89         | 6.13         | 0.90         | 0.78         | 0.77         | 1.41         |

Supplemental Table 4 Expression ratios of other important genes

|      |      |         |    |    |
|------|------|---------|----|----|
| <0.2 | <0.5 | 0.5 – 2 | >2 | >5 |
|------|------|---------|----|----|

| Locus                                                 | Gene    | Description                                         | Root         |              |              |              | DC           |              |              |              | Stem         |              |              |              | Old leaf     |              |              |              | Newest leaf  |              |              |              |
|-------------------------------------------------------|---------|-----------------------------------------------------|--------------|--------------|--------------|--------------|--------------|--------------|--------------|--------------|--------------|--------------|--------------|--------------|--------------|--------------|--------------|--------------|--------------|--------------|--------------|--------------|
|                                                       |         |                                                     | × 10/<br>× 1 | × 20/<br>× 1 | × 50/<br>× 1 | × 70/<br>× 1 | × 10/<br>× 1 | × 20/<br>× 1 | × 50/<br>× 1 | × 70/<br>× 1 | × 10/<br>× 1 | × 20/<br>× 1 | × 50/<br>× 1 | × 70/<br>× 1 | × 10/<br>× 1 | × 20/<br>× 1 | × 50/<br>× 1 | × 70/<br>× 1 | × 10/<br>× 1 | × 20/<br>× 1 | × 50/<br>× 1 | × 70/<br>× 1 |
| The genes related to oxidative stress                 |         |                                                     |              |              |              |              |              |              |              |              |              |              |              |              |              |              |              |              |              |              |              |              |
| Os08g0561700                                          | CuZnSOD | OsSOD4, OsCSD4, Similar to Superoxide dismutase     | 0.99         | 1.03         | 1.01         | 0.93         | 0.95         | 0.99         | 0.90         | 0.86         | 1.16         | 0.87         | 1.27         | 0.92         | 0.96         | 1.14         | 1.65         | 2.12         | 3.15         | 2.20         | 2.05         | 2.00         |
| Os07g0665300                                          |         | Similar to Superoxide dismutase                     | 0.78         | 1.00         | 0.99         | 1.09         | 1.04         | 1.13         | 1.14         | 1.13         | 0.98         | 1.12         | 1.11         | 1.01         | 1.00         | 1.08         | 1.06         | 0.95         | 0.84         | 0.95         | 0.97         | 0.92         |
| Os03g0285700                                          | OsAPX1  | APXa, OsAPx01, Similar to L-ascorbate peroxidase    | 1.53         | 1.48         | 1.65         | 1.54         | 1.25         | 1.14         | 1.25         | 1.20         | 0.57         | 1.04         | 0.74         | 1.42         | 0.84         | 1.03         | 1.68         | 2.21         | 0.95         | 0.92         | 1.09         | 1.28         |
| Os10g0415300                                          | OsGR3   | GR3, Similar to Chloroplastic glutathione reductase | 1.19         | 1.13         | 1.57         | 1.99         | 0.96         | 0.72         | 0.52         | 1.05         | 0.33         | 0.98         | 0.57         | 1.73         | 0.82         | 1.07         | 1.73         | 2.42         | 0.51         | 0.82         | 1.08         | 1.11         |
| Os02g0280700                                          |         | Similar to iron/ascorbate-dependent oxidoreductase  | 1.00         | 1.55         | 1.04         | 0.81         | 0.95         | 1.05         | 1.15         | 1.77         | 1.88         | 1.05         | 1.43         | 0.75         | 0.84         | 0.77         | 1.56         | 1.41         | 3.59         | 3.30         | 2.19         | 2.42         |
| Os07g0531400                                          |         | Peroxidase                                          | 50.45        | 32.76        | 91.13        | 116.12       | 4.49         | 6.66         | 49.60        | 38.73        | 1.03         | 0.89         | 2.25         | 22.45        | 0.76         | 0.12         | 0.46         | 12.21        | 0.70         | 0.65         | 0.73         | 0.74         |
| Os11g0112200                                          |         | Cationic peroxidase                                 | 0.68         | 0.63         | 1.37         | 1.82         | 0.56         | 0.33         | 1.41         | 1.39         | 1.35         | 1.02         | 2.47         | 11.49        | 0.87         | 1.61         | 19.32        | 28.85        | 0.70         | 0.71         | 0.65         | 3.19         |
| Os01g0327100                                          |         | Haem peroxidase family protein                      | 0.69         | 0.69         | 0.45         | 0.36         | 0.75         | 0.54         | 0.57         | 0.65         | 1.54         | 1.22         | 2.29         | 2.16         | 2.88         | 4.00         | 26.98        | 155.14       | 5.78         | 3.54         | 2.89         | 3.58         |
| Os10g0527400                                          | OsGSTU3 | Similar to Tau class GST protein 3                  | 0.30         | 0.30         | 0.17         | 0.27         | 0.72         | 0.36         | 0.61         | 1.15         | 0.62         | 0.33         | 1.11         | 16.87        | 0.28         | 0.79         | 1.69         | 12.53        | 2.53         | 1.28         | 3.62         | 2.91         |
| The genes involved in oxygen and electron transfer    |         |                                                     |              |              |              |              |              |              |              |              |              |              |              |              |              |              |              |              |              |              |              |              |
| Os05g0529700                                          |         | Heat shock protein DnaJ family protein              | 0.84         | 0.49         | 0.65         | 0.75         | 1.68         | 0.65         | 0.74         | 0.78         | 2.78         | 0.87         | 0.89         | 1.78         | 0.88         | 0.80         | 1.39         | 1.98         | 0.82         | 0.83         | 0.85         | 0.89         |
| Os06g0549900                                          |         | Reticuliline oxidase-like protein                   | 0.40         | 0.53         | 0.27         | 0.34         | 1.39         | 1.09         | 1.11         | 1.27         | 1.18         | 1.12         | 7.18         | 92.56        | 0.75         | 0.78         | 3.17         | 81.41        | 1.78         | 2.06         | 1.30         | 1.54         |
| Os02g0218700                                          |         | Similar to Allene oxide synthase                    | 0.35         | 0.37         | 0.38         | 0.55         | 0.86         | 0.38         | 0.60         | 0.67         | 1.74         | 2.11         | 2.15         | 7.61         | 0.97         | 1.12         | 12.55        | 25.40        | 0.95         | 1.19         | 1.09         | 1.89         |
| Os04g0600300                                          |         | Alternative oxidase                                 | 0.24         | 0.29         | 0.17         | 0.22         | 0.79         | 0.31         | 0.62         | 0.70         | 0.32         | 0.51         | 3.03         | 35.70        | 0.50         | 0.96         | 7.05         | 36.75        | 0.83         | 0.91         | 2.05         | 3.50         |
| Os08g0105700                                          |         | Cytochrome P450; Similar to Bx2-like protein        | 0.74         | 0.53         | 0.71         | 0.81         | 0.75         | 0.65         | 0.79         | 0.83         | 0.90         | 1.13         | 0.96         | 2.03         | 1.12         | 1.73         | 2.50         | 14.28        | 1.89         | 1.04         | 1.42         | 1.56         |
| The genes involved in cytochrome P450 family proteins |         |                                                     |              |              |              |              |              |              |              |              |              |              |              |              |              |              |              |              |              |              |              |              |
| Os06g0294600                                          |         | Cytochrome P450 family protein                      | 0.59         | 1.13         | 0.49         | 0.34         | 0.48         | 0.48         | 0.39         | 0.40         | 1.34         | 1.30         | 2.10         | 4.53         | 1.63         | 0.83         | 2.90         | 6.10         | 7.15         | 5.84         | 3.59         | 4.36         |
| Os03g0594100                                          |         | Cytochrome P450 family protein                      | 0.54         | 0.86         | 0.31         | 0.36         | 0.41         | 0.12         | 0.22         | 0.56         | 0.65         | 0.94         | 3.94         | 16.96        | 0.84         | 1.83         | 5.85         | 21.79        | 0.74         | 0.96         | 1.21         | 4.72         |
| Os03g0570100                                          |         | Cytochrome P450 79A1 (EC 1.14.13.41)                | 0.31         | 0.48         | 0.07         | 0.21         | 0.54         | 0.18         | 0.22         | 0.93         | 0.15         | 1.01         | 0.61         | 8.11         | 0.75         | 0.74         | 4.00         | 28.72        | 0.67         | 0.71         | 0.71         | 1.01         |
| Os02g0571900                                          |         | Cytochrome P450 family protein                      | 0.54         | 0.63         | 0.09         | 0.16         | 0.32         | 0.14         | 0.21         | 0.55         | 1.18         | 0.48         | 3.56         | 29.36        | 1.49         | 2.32         | 13.60        | 14.11        | 1.86         | 1.23         | 2.62         | 5.44         |
| Os02g0569900                                          |         | Cytochrome P450 family protein                      | 0.33         | 0.46         | 0.31         | 0.39         | 0.27         | 0.10         | 0.21         | 0.67         | 0.60         | 1.01         | 5.23         | 50.31        | 0.25         | 0.41         | 0.72         | 11.80        | 0.78         | 1.77         | 2.69         | 5.22         |
| Os10g0439800                                          |         | Cytochrome P450 family protein                      | 0.27         | 0.35         | 0.11         | 0.18         | 0.28         | 0.34         | 0.20         | 0.47         | 0.30         | 0.29         | 1.79         | 23.68        | 0.75         | 0.74         | 8.96         | 31.92        | 0.67         | 0.64         | 0.70         | 1.04         |
| Other genes induced in DC                             |         |                                                     |              |              |              |              |              |              |              |              |              |              |              |              |              |              |              |              |              |              |              |              |
| Os07g0531400                                          |         | Heme Peroxidase                                     | 50.45        | 32.76        | 91.13        | 116.12       | 4.49         | 6.66         | 49.60        | 38.73        | 1.03         | 0.89         | 2.25         | 22.45        | 0.76         | 0.12         | 0.46         | 12.21        | 0.70         | 0.65         | 0.73         | 0.74         |
| Os08g0434100                                          | OsRNS3  | S-like ribonuclease (RNase PD2)                     | 1.90         | 1.64         | 1.55         | 1.37         | 2.48         | 2.31         | 2.46         | 2.01         | 1.45         | 1.23         | 1.55         | 1.46         | 1.02         | 1.16         | 1.34         | 1.00         | 1.26         | 1.40         | 1.68         | 2.10         |
| Os09g0537700                                          | OsRNS4  | S-like ribonuclease (RNase PD2)                     | 1.82         | 0.75         | 0.95         | 0.71         | 21.95        | 36.94        | 40.01        | 6.70         | 2.66         | 1.99         | 1.54         | 1.34         | 3.57         | 4.22         | 2.50         | 0.48         | 1.87         | 1.32         | 2.62         | 1.10         |
| Os01g0127000                                          |         | MultiCu oxidase                                     | 10.48        | 7.25         | 9.23         | 10.31        | 2.90         | 3.01         | 9.13         | 8.99         | 1.61         | 1.10         | 1.79         | 1.14         | 1.20         | 1.16         | 0.98         | 0.69         | 1.21         | 1.05         | 1.65         | 1.00         |
| Os11g0151700                                          |         | Purple acid phosphatase (IRO2-regulated)            | 1.82         | 2.82         | 4.69         | 6.39         | 4.31         | 4.73         | 5.30         | 3.65         | 2.45         | 1.33         | 1.61         | 1.07         | 1.16         | 1.28         | 1.63         | 1.71         | 1.37         | 1.39         | 1.34         | 1.19         |
| Os07g0468200                                          |         | Hypothetical protein                                | 1.52         | 1.17         | 1.84         | 2.64         | 5.17         | 2.02         | 4.85         | 4.46         | 1.77         | 1.19         | 1.31         | 2.95         | 1.67         | 0.99         | 2.82         | 7.41         | 0.72         | 0.77         | 0.78         | 0.92         |
| Os06g0486900                                          | FDH     | Formate dehydrogenase, mitochondrial precursor      | 1.59         | 1.49         | 1.86         | 1.38         | 9.44         | 5.22         | 2.01         | 6.23         | 0.59         | 0.69         | 0.42         | 3.08         | 0.76         | 0.50         | 0.75         | 3.82         | 1.34         | 1.05         | 1.00         | 0.78         |

Gene Annotation: Gene functions are as according to RAP-DB and Quinet *et al.* 2012.
